# Supplementary material
Source: Atypon-hosted journal article supplement (https://mail.jpma.org.pk/PdfDownloadsupplements/592)
Supplement: 592 [file 592]

## The mRNA expression of Forkhead box O3a (FOXO3a) as a longevity-associated gene in leucocytes of elderly women

Novi Silvia Hardiany,<sup>1</sup> Sucitra,<sup>2</sup> Reni Paramita<sup>3</sup>

### Abstract

**Objective:** -This study aimed to analyse the expression pattern of FOXO3a in leucocytes of elderly women according to their lifespans.

**Methods:** It was a cross-sectional study involving 60 healthy elderly female subjects living in Jakarta. Women were classified based on age as younger (60-70 years of age) and older (> 70 years of age). Blood samples were taken for the preparation of leucocyte cells for RNA isolation. FOXO3a mRNA expression was analysed using quantitative polymerase chain reaction (qPCR).

**Results:** The relative mRNA expression of FOXO3a in leucocytes was significantly higher in the younger group (60-70 years of age) than in the older group (> 70 years of age).

**Conclusion:** FOXO3a mRNA expression decreased with increasing age in elderly female subjects. Further research is required to evaluate FOXO3a expression at the protein level.

**Keywords:** FOXO3a, mRNA expression, Elderly female. (JPMA 71: S-74 [Suppl. 2]; 2021)

### Introduction

The transcription factor Forkhead box O3a (FOXO3a) is believed to act as an anti-ageing molecule, and its expression is thought to be associated with longevity.<sup>1</sup> These hypotheses may be linked to the action of FOXO3a, which protects cells from oxidative damage by increasing the expression of endogenous antioxidant enzymes, such as manganese superoxide dismutase (MnSOD) and catalase, that eliminate free radicals.<sup>2</sup> The accumulation of free radicals is known to cause oxidative stress, which leads to the ageing process.<sup>3</sup>

Ageing is defined as an inevitable biological phase in which the physiological function of the body gradually decreases, thereby encouraging degenerative diseases and eventually leading to death.<sup>4</sup> The size of the elderly population is now growing globally, and Indonesia is seeing a significant increase in the number of elderly women.<sup>5</sup> Therefore, the biological and molecular ageing mechanisms require more comprehensive training to preserve the health status of elderly people and to detect anti-ageing molecules. The alleged function of FOXO3a as an anti-ageing molecule indicates the possibility of slowing the ageing process, and maintaining a stable and active ageing status among the elderly by modulating FOXO3a expression.

FOXO3a is expressed in different cells, such as the brain,

liver, lung, muscle and skin.<sup>6</sup> However, FOXO3a expression in aged cells is not well known. This study aimed to analyse the expression patterns of FOXO3a in leucocytes from elderly women classified, according to lifespans. This is a preliminary study to expand on the potential function of FOXO3a as a longevity biomarker.

### Subjects and Methods

This cross-sectional study was done from August 2018 until January 2019 on 60 elderly females living in Jakarta, Indonesia. Consecutive sampling method was chosen and the inclusion criteria included healthy elderly women over 60 years of age who signed an informed consent form. Exclusion criteria included subjects with total immobility, hypertensive emergency or severe exacerbation of chronic obstructive pulmonary disease. Subjects were grouped by age into younger group (60-70 years of age) and older group (> 70 years of age). Ethical permission was taken from the Ethics Committee of the Faculty of Medicine, Universitas Indonesia (Number 0910/UN2.F1/ETIK/2018).

Blood samples were collected from all subjects for the preparation of leucocyte cells. Total RNA was isolated from the leucocytes using the kit (Tripure RNA Isolation kit, Roche®) following the manufacturer's instructions. Concentrations of RNA and purity were measured with a spectrophotometer. Total RNA was kept at -80°C before it was used.

FOXO3a mRNA expression was analysed using a SYBR Sensi Fast One-Step qRT-PCR kit (Bioline®) and detected by the quantitative polymerase chain reaction (qPCR). Primers for FOXO3a were 5'-TCTACGAGTGGATGGTGC GTT-3' (Forward)

.....  
<sup>1</sup>Department of BioChemistry and Molecular Biology, <sup>2</sup>Master Program in BioMedical Sciences, <sup>3</sup>Department of BioChemistry and Molecular Biology, Universitas Indonesia, Jakarta, Indonesia.

**Correspondence:** Novi Silvia Hardiany. Email: novish98@gmail.com

and 5'-CGACTATGCAGTGACAGGTGG-3' (Reverse),<sup>7</sup> while primers for 18S rRNA, as the housekeeping gene, were 5'-AAACGCCTACCACATCCAAG-3' (Forward) and 5'-CCTCCAATGGATCCTCGT TA-3' (Reverse).<sup>8</sup> The relative mRNA expression of FOXO3a was calculated using the Livak method<sup>9</sup> as a ratio compared to the control. The controls used in this research were ten young women aged 20-30 years old.

Data were presented as minimum-maximum values with medians because the data was not normally distributed. The data was analysed using the Mann Whitney test.

**Results**

Characteristics of the age of the subjects are shown in

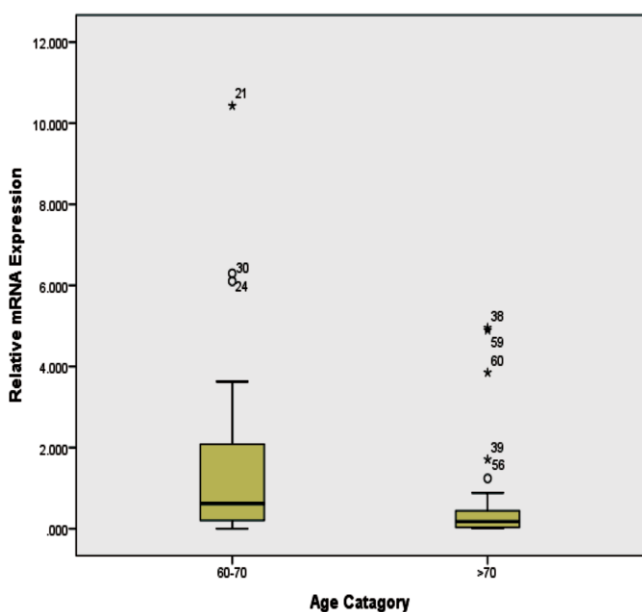

**Figure:** Relative mRNA expression of FOXO3a in leucocytes of elderly women based on age.

**Table:** The age characteristics of the study subjects.

| Category        | Age (years old) | Number (subject) | Category       | Age (years old) | Number (subject) |
|-----------------|-----------------|------------------|----------------|-----------------|------------------|
| 60-70 years old | 60              | 6                | > 70 years old | 71              | 2                |
|                 | 61              | 1                |                | 72              | 3                |
|                 | 62              | 4                |                | 73              | 5                |
|                 | 63              | 3                |                | 74              | 2                |
|                 | 64              | 3                |                | 75              | 7                |
|                 | 65              | 2                |                | 76              | 3                |
|                 | 66              | 1                |                | 77              | 1                |
|                 | 67              | 3                |                | 78              | 1                |
|                 | 68              | 3                |                | 79              | 1                |
|                 | 70              | 4                |                | 80              | 1                |
|                 |                 |                  | 81             | 1               |                  |
|                 |                 |                  | 84             | 2               |                  |
|                 |                 |                  | 100            | 1               |                  |
|                 |                 |                  | Total          | 30              |                  |
|                 |                 |                  | Total          | 30              |                  |

Table. The most common age among the subjects was 60 years in the younger group and 75 years old in the older group. The study population included only one centenarian subject. The relative mRNA expression of FOXO3a was 0.001 - 10.48 (median 0.62) in the younger group (60-70 years old) and 0.003 - 4.593 (median 0.175) in the older group (> 70 years old), as shown in Figure. The difference between these groups was statistically significant ( $p < 0.05$ ); the pattern of mRNA expression of FOXO3a indicated significantly lower expression in the older group than in the younger group. The expression values, however, varied widely in each group.

**Discussion**

FOXO3 belongs to subclass O of the Forkhead family of transcription factors that have a DNA-binding domain for specific target genes. FOXO3 acts as the master regulator for gluconeogenesis, DNA repair, cell cycle arrest, stem cell homeostasis, immune system modulation, differentiation, cell death, redox balance and proteostasis.<sup>1</sup> The FOXO3a transcription factor can be inhibited and translocated from the nucleus when phosphorylated at the Ser-253 residue by the AKT/PKB protein associated with the PI3K signalling pathway. The proteasome then degrades phosphorylated FOXO3a. By comparison, dephosphorylation of the phosphatase-2A protein promotes the restoration of the nuclear location of FOXO3a and activation of its target genes.<sup>10</sup>

The results presented here support a decrease in the relative mRNA expression of FOXO3a with increasing age. The lower expression at the mRNA level in the older group might be a consequence of the degradation of the 3'-untranslated region (3'-UTR) by microRNAs (miRNAs). This degradation is one of the mechanisms to regulate FOXO3a expression in certain conditions as several

studies support the regulation of FOXO3a expression by miRNAs. For example, a previous experimental study of breast cancer and glioma showed that overexpression of miR-155 decreased FOXO3a expression, while knockdown of miR-155 increased FOXO3a expression.<sup>11,12</sup> FOXO3a is also regulated by other miRNAs, such as miR-132, miR-212 and miR-27a, as downregulation of FOXO3a by miR-132 and 212 caused neuronal apoptosis in Alzheimer disease<sup>13</sup> and miR-132 and 212 promoted pathogenesis of bowel inflammatory disease.<sup>14</sup> In glioblastoma cells, miR-27a expression inhibited the transcriptional activity of FOXO3a, while suppression of miR-27a increased FOXO3a expression.<sup>15</sup> In idiopathic pulmonary fibrosis, miR-96 degraded the 3'UTR of FOXO3a mRNA, resulting in a low level of FOXO3a expression.<sup>16</sup> However, no particular miRNA was identified that could play a role in normal cell ageing. In future studies, therefore, miRNA analysis is required to explain the low FOXO3a mRNA level observed in elderly women in this study.

The low level of FOXO3a mRNA expression may be a response to high levels of the FOXO3a protein. Analysis of FOXO3a protein is therefore required to validate our findings. However, Pradhan et al.<sup>17</sup> observed a substantial decrease in FOXO3a protein expression with increasing age in the serum of subjects in three age groups (20-30 years old, 60-79 years old and > 80 years old) subjected to stress. These researchers indicated that FOXO3a protein may affect redox homeostasis and evoke age-related disease.<sup>17</sup>

The FOXO3a mRNA expression in our research has shown a varied range that may indicate the existence of genetic polymorphisms of the FOXO3a gene. FOXO3 polymorphism has been associated with longevity in Japanese, German, Italian, Danish and Chinese populations,<sup>18</sup> but polymorphisms have not yet been identified in the Indonesian population. Polymorphism analysis is therefore needed in future research. Li et al<sup>19</sup> showed more single-nucleotide polymorphisms (SNPs) in centenarians than in a younger population. Polymorphic genes could increase the enhancer activity of FOXO3a, allowing for an increase in FOXO3a expression.<sup>20</sup> One of the limitations of our study was that the level of FOXO3 expression was only measured at the mRNA level, which does not always reflect the protein level.

## Conclusion

FOXO3a mRNA expression showed a particular pattern of expression in the leucocytes of elderly women classified by age. Overall, the mRNA FOXO3a expression decreased with rising age. However, more research is required to

evaluate FOXO3a expression at the protein level for the establishment of FOXO3a as an anti-ageing biomarker.

**Disclaimer:** This research was presented in Malaysia - Indonesia - Brunei Medical Science Conference in 2019 and was part of a thesis project.

**Conflict of Interest:** None.

**Funding Disclosure:** This study was funded by Ministry of Research, Technology and Higher Education Republic of Indonesia through Thesis Magister grant 2019.

## References

- Morris BJ, Willcox DC, Donlon TA, Willcox BJ. FOXO3: A Major Gene for Human Longevity--A Mini-Review. *Gerontology* 2015;61:515-25. doi: 10.1159/000375235.
- Lu Q, Zhai Y, Cheng Q, Liu Y, Gao X, Zhang T, et al. The Akt-FoxO3a-manganese superoxide dismutase pathway is involved in the regulation of oxidative stress in diabetic nephropathy. *Exp Physiol* 2013;98:934-45. doi: 10.1113/expphysiol.2012.068361.
- Salmon AB, Richardson A, Pérez VI. Update on the oxidative stress theory of aging: does oxidative stress play a role in aging or healthy aging? *Free Radic Biol Med* 2010;48:642-55. doi: 10.1016/j.freeradbiomed.2009.12.015.
- Aunan JR, Watson MM, Hagland HR, Søreide K. Molecular and biological hallmarks of ageing. *Br J Surg* 2016;103:e29-46. doi: 10.1002/bjs.10053.
- Kemenkes RI. Elderly situation and analysis. [Online] 2014 [Cited 2018 December 19]. Available from URL: <http://www.depkes.go.id/resources/download/pusdatin/infodatin/infodatin%20lansia%202016.pdf>
- Carter ME, Brunet A. FOXO transcription factors. *Curr Biol* 2007;17:113-4. doi: 10.1016/j.cub.2007.01.008.
- Chen J, Gomes AR, Monteiro LJ, Wong SY, Wu LH, Ng TT, et al. Constitutively nuclear FOXO3a localization predicts poor survival and promotes Akt phosphorylation in breast cancer. *PLoS One* 2010;5:e12293. doi: 10.1371/journal.pone.0012293.
- Hardiany NS, Sadikin M, Siregar N, Wanandi SI. The suppression of manganese superoxide dismutase decreased the survival of human glioblastoma multiforme T98G cells. *Med J Indones* 2017;26:19-25. Doi: 10.13181/mji.v26i1.1511
- Livak KJ, Schmittgen TD. Analysis of relative gene expression data using real-time quantitative PCR and the 2(-Delta Delta C(T)) method. *Methods* 2001; 25: 402-8. doi: 10.1006/meth.2001.1262.
- Wang X, Hu S, Liu L. Phosphorylation and acetylation modifications of FOXO3a: Independently or synergistically? *Oncol Lett* 2017;13:2867-72. doi: 10.3892/ol.2017.5851.
- Kong W, He L, Coppola M, Guo J, Esposito NN, Coppola D, et al. MicroRNA-155 regulates cell survival, growth, and chemosensitivity by targeting FOXO3a in breast cancer. *J Biol Chem* 2010;285:17869-79. doi: 10.1074/jbc.M110.101055.
- Ling N, Gu J, Lei Z, Li M, Zhao J, Zhang HT, et al. microRNA-155 regulates cell proliferation and invasion by targeting FOXO3a in glioma. *Oncol Rep* 2013;30:2111-8. doi: 10.3892/or.2013.2685.
- Wong HK, Veremeyko T, Patel N, Lemere CA, Walsh DM, Esau C, et al. De-repression of FOXO3a death axis by microRNA-132 and -212 causes neuronal apoptosis in Alzheimer's disease. *Hum Mol Genet* 2013;22:3077-92. doi: 10.1093/hmg/ddt164.
- Kim HY, Kwon HY, Ha Thi HT, Lee HJ, Kim GI, Hahm KB, et al. MicroRNA-132 and microRNA-223 control positive feedback circuit by regulating FOXO3a in inflammatory bowel disease. *J Gastroenterol Hepatol* 2016;31:1727-35. doi: 10.1111/jgh.13321.

15. Ge YF, Sun J, Jin CJ, Cao BQ, Jiang ZF, Shao JF. AntagomiR-27a targets FOXO3a in glioblastoma and suppresses U87 cell growth in vitro and in vivo. *Asian Pacific J Cancer Prev* 2013;14:963-8. DOI: 10.7314/APJCP.2013.14.2.963
  16. Nho RS, Im J, Ho YY, Hergert P. MicroRNA-96 inhibits FoxO3a function in IPF fibroblasts on type I collagen matrix. *Am J Physiol Lung Cell Mol Physiol* 2014; 307:632-42. doi: 10.1152/ajplung.00127.2014.
  17. Pradhan R, Kumar R, Shekhar S, Rai N, Ambashtha A, Banerjee J, et al. Longevity and healthy ageing genes FOXO3A and SIRT3: Serum protein marker and new road map to burst oxidative stress by *Withania somnifera*. *Exp Gerontol* 2017; 95:9-15. doi: 10.1016/j.exger.2017.05.013.
  18. Bao JM, Song XL, Hong YQ, Zhu HL, Li C, Zhang T, et al. Association between FOXO3A gene polymorphisms and human longevity: a meta-analysis. *Asian J Androl* 2014;16:446-52. doi: 10.4103/1008-682X.123673.
  19. Li Y, Wang WJ, Cao H, Lu J, Wu C, Hu FY, et al. Genetic association of FOXO1A and FOXO3A with longevity trait in Han Chinese populations. *Hum Mol Genet* 2009;18:4897-904. doi: 10.1093/hmg/ddp459.
  20. Flachsbart F, Dose J, Gentschew L, Geismann C, Caliebe A, Knecht C, et al. Identification and characterization of two functional variants in the human longevity gene FOXO3. *Nat Commun* 2017; 8:2063. doi: 10.1038/s41467-017-02183-y.
-
